# Supplementary material for: Inoculation of Barley (Hordeum vulgare) with the Endophyte Epichloë bromicola Affects Plant Growth, and the Microbial Community in Roots and Rhizosphere Soil
Source: MDPI journal article supplement (doi:10.3390/jof8020172), 2022-02-10
Supplement: s1 [file s1]

Table S1 Inoculation rate changes of *E. bromicola*-barley new symbionts. LZ: *E.bromicola* were not successfully inoculated into *Hordeum vulgare* cv. Yangsimai No. 1, LQ: *E.bromicola* were not successfully inoculated into *H. vulgare* var. nudum cv. Chaqing No. 1. LZ+4 and LQ+4: Fourth generation of LZ and LQ inoculation with *Epichloë* that harvested in 2020.

| Association | Plant No. tested | Plant No. inoculation | Inoculation rate | Seed No. tested | seed No. inoculation | Inoculation rate |
|-------------|------------------|-----------------------|------------------|-----------------|----------------------|------------------|
| LZ          | 20               | 0                     | 0                | 50              | 0                    | 0                |
| LZ+4        | 50               | 38                    | 76               | 100             | 56                   | 56               |
| LQ          | 20               | 0                     | 0                | 50              | 0                    | 0                |
| LQ+4        | 50               | 34                    | 68               | 100             | 47                   | 47               |

Table S2 Rhizosphere soil properties associated with different kinds of barley under varieties (V) and endophyte (E) treatments, and results of two-way analysis of variance (two-way ANOVA) for the S and E on rhizosphere soil properties. E\*V: interaction of *E. bromicola* and species. SOC:Organic Carbon, TP:Total Phosphorus, TN:Total nitrogen, C/N:The OC and TN ratio, C/P:the OC and TP ratio, N/P:The TN and TP ratio. \* indicates  $P < 0.05$ .

| Varities | Tretments | TN (g/kg)   |          | TP (g/kg)   |               | SOC (g/kg)  |          | N/P (%)     |               | C/N (%)     |          | C/P (%)      |          |
|----------|-----------|-------------|----------|-------------|---------------|-------------|----------|-------------|---------------|-------------|----------|--------------|----------|
| LZ+4     | EI        | 1.077±0.008 |          | 0.520±0.055 |               | 6.440±0.477 |          | 2.080±0.110 |               | 6.013±0.462 |          | 12.453±0.758 |          |
|          | EF        | 1.067±0.007 |          | 0.663±0.026 |               | 7.197±0.468 |          | 1.610±0.049 |               | 6.747±0.439 |          | 10.883±0.962 |          |
| LQ+4     | EI        | 1.153±0.020 |          | 0.533±0.070 |               | 7.343±0.348 |          | 2.237±0.292 |               | 6.377±0.214 |          | 14.267±1.964 |          |
|          | EF        | 1.12±0.031  |          | 0.607±0.003 |               | 7.237±0.326 |          | 1.850±0.055 |               | 6.473±0.460 |          | 11.927±0.510 |          |
|          |           | <i>F</i>    | <i>P</i> | <i>F</i>    | <i>P</i>      | <i>F</i>    | <i>P</i> | <i>F</i>    | <i>P</i>      | <i>F</i>    | <i>P</i> | <i>F</i>     | <i>P</i> |
|          | E         | 2.020       | 0.193    | 0.218       | 0.653         | 1.320       | 0.284    | 1.526       | 0.252         | 0.012       | 0.915    | 1.453        | 0.263    |
|          | S         | 0.224       | 0.648    | 5.459       | <b>0.048*</b> | 0.627       | 0.451    | 7.120       | <b>0.028*</b> | 1.038       | 0.338    | 2.722        | 0.138    |
|          | E*S       | 0.065       | 0.805    | 0.570       | 0.472         | 1.106       | 0.324    | 0.067       | 0.802         | 0.611       | 0.457    | 0.106        | 0.754    |

Table S3 Pearson correlations of alpha diversity in root and rhizosphere soil bacteria and fungi community to soil properties and peramine. SOC:Organic Carbon, TP:Total Phosphorus, TN:Total nitrogen, C/N:The OC and TN ratio, C/P:the OC and TP ratio, N/P:The TN and TP ratio. \* indicates  $P < 0.05$ , \*\* indicates  $P < 0.01$ .

| Soil properties | Root            |              |                 |              |          |       |        |       | rhizosphere soil |       |                 |              |          |       |        |       |
|-----------------|-----------------|--------------|-----------------|--------------|----------|-------|--------|-------|------------------|-------|-----------------|--------------|----------|-------|--------|-------|
|                 | Fungi           |              |                 |              | bacteria |       |        |       | Fungi            |       |                 |              | bacteria |       |        |       |
|                 | Shannon         |              | Chao1           |              | Shannon  |       | Chao1  |       | Shannon          |       | Chao1           |              | Shannon  |       | Chao1  |       |
|                 | F               | P            | F               | P            | F        | P     | F      | P     | F                | P     | F               | P            | F        | P     | F      | P     |
| N               | 0.086           | 0.751        | 0.067           | 0.806        | -0.033   | 0.904 | 0.035  | 0.897 | -0.028           | 0.917 | -0.094          | 0.728        | 0.018    | 0.952 | 0.036  | 0.903 |
| P               | <b>-0.724 *</b> | <b>0.002</b> | <b>-0.623 *</b> | <b>0.01</b>  | 0.319    | 0.228 | -0.129 | 0.635 | -0.427           | 0.099 | <b>-0.532 *</b> | <b>0.034</b> | -0.1     | 0.734 | -0.067 | 0.82  |
| C               | -0.122          | 0.654        | 0.115           | 0.671        | 0.409    | 0.116 | 0.24   | 0.37  | 0.194            | 0.472 | -0.037          | 0.893        | 0.126    | 0.667 | 0.113  | 0.7   |
| N/P             | <b>0.669 *</b>  | <b>0.005</b> | <b>0.603 *</b>  | <b>0.013</b> | 0.287    | 0.282 | 0.14   | 0.605 | 0.388            | 0.137 | 0.428           | 0.098        | 0.17     | 0.56  | 0.142  | 0.627 |
| C/N             | -0.109          | 0.687        | 0               | 0.999        | 0.426    | 0.1   | 0.124  | 0.648 | 0.202            | 0.454 | 0.106           | 0.695        | 0.11     | 0.708 | 0.118  | 0.688 |
| C/P             | <b>0.53 *</b>   | <b>0.035</b> | <b>0.602 *</b>  | <b>0.014</b> | -0.034   | 0.901 | 0.243  | 0.364 | 0.466            | 0.069 | 0.395           | 0.13         | 0.29     | 0.314 | 0.255  | 0.379 |
| Peramine        | 0.334           | 0.206        | 0.419           | 0.107        | -0.055   | 0.841 | 0.261  | 0.329 | 0.392            | 0.133 | <b>0.516 *</b>  | <b>0.041</b> | 0.172    | 0.558 | 0.198  | 0.498 |
